# Supplementary material for: Kinetics and Mechanism of Camptothecin Release from Transferrin-Gated Mesoporous Silica Nanoparticles through a pH-Responsive Surface Linker
Source: MDPI journal article supplement (doi:10.3390/pharmaceutics15061590), 2023-05-25
Supplement: s1 [file s1]

# Supplementary Materials: Kinetics and Mechanism of Camptothecin Release from Transferrin-Gated Mesoporous Silica nanoparticles through a pH-Responsive Surface Linker

Nicolás Jackson, Andrea C. Ortiz, Alejandro Jerez, Javier Morales and Francisco Arriagada

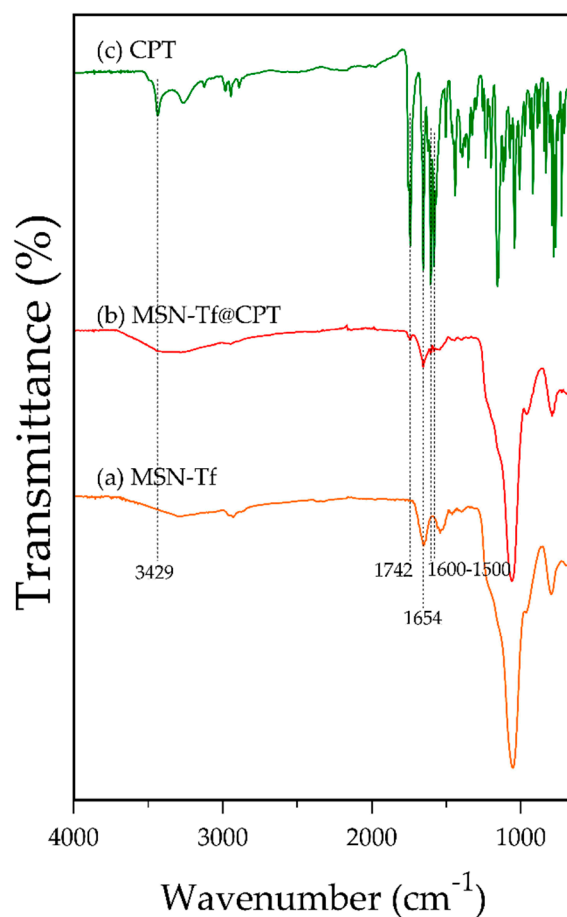

**Figure S1.** FTIR spectra of nanomaterial samples and raw drug. (a) MSN-Tf, (b) MSN-Tf@CPT, and (c) CPT.

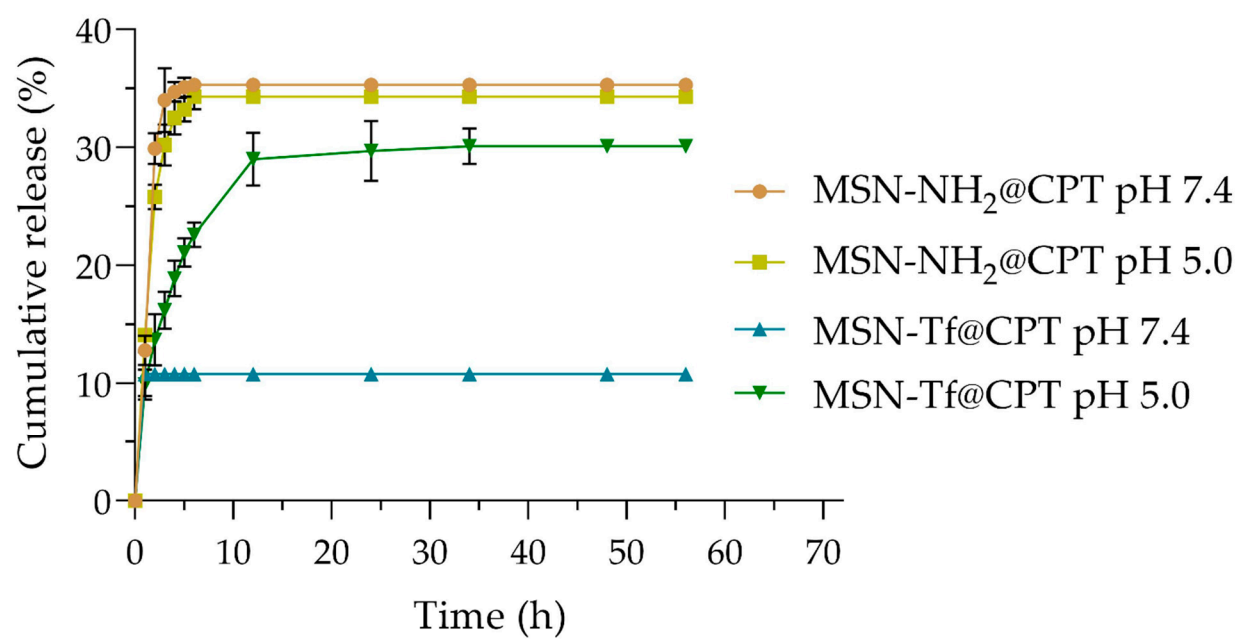

**Figure S2.** Full release profile of camptothecin from nanomaterials.
